# Supplementary material
Source: MDPI journal article supplement (https://www.mdpi.com/2072-4292/14/3/556)
Supplement: s1 [file s1 › remotesensing-1495667-supplementary.pdf]

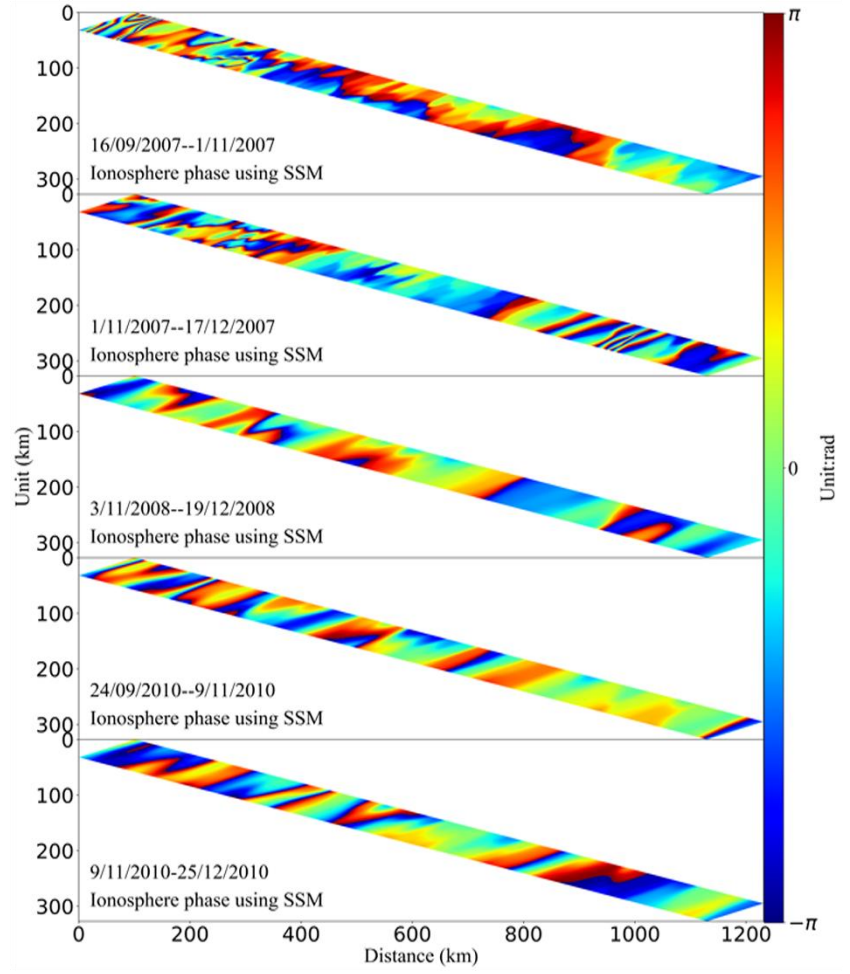

**Figure S1.** Estimated ionospheric effects using SSM. Five ionospheric phase indicates the differential ionospheric phase corresponding to the time series interferograms.

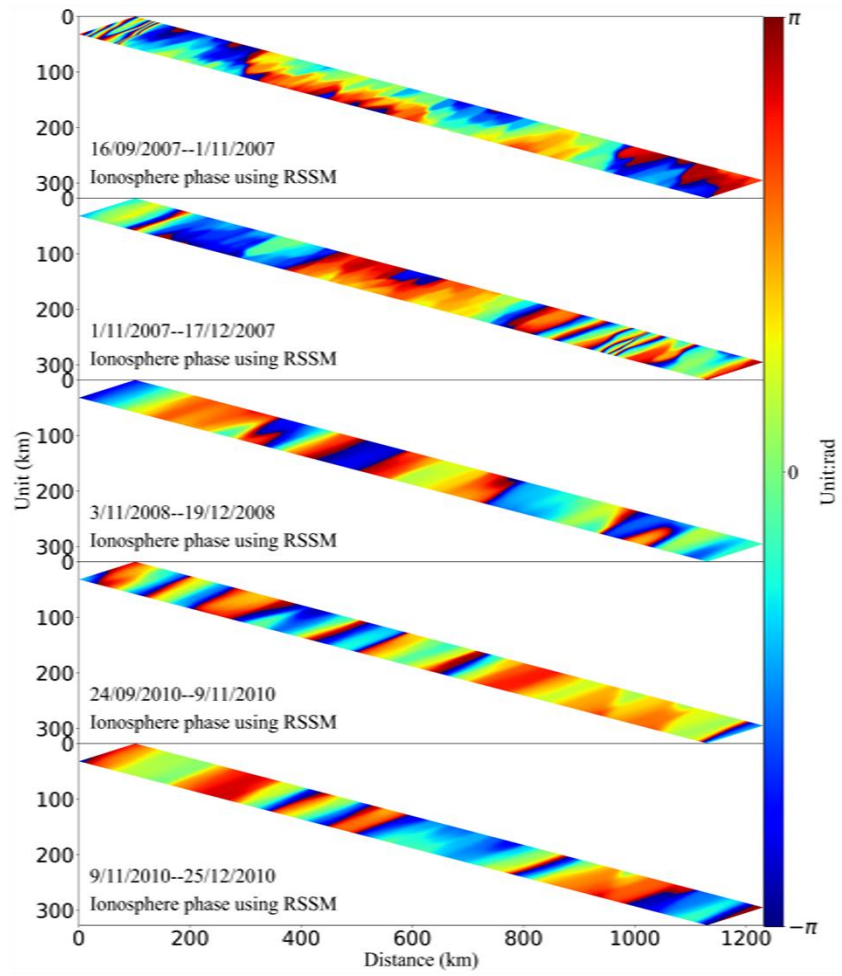

**Figure S2.** Estimated ionospheric effects using RSSM. Five ionospheric phase indicates the differential ionospheric signal corresponding to the time series interferograms.

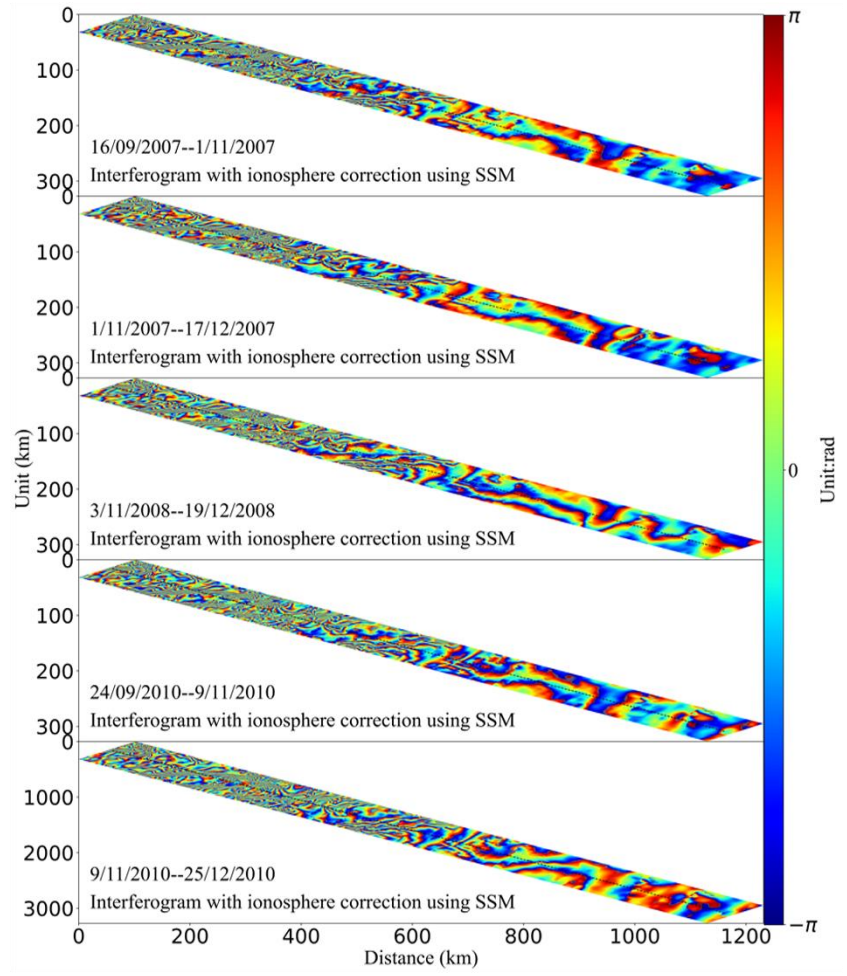

**Figure S3.** The time-series interferograms with ionosphere correction using the SSM in Antarctica. The five interferograms for the five acquisition time as shown in **Table 1**.
